# Supplementary material for: A case report of endocarditis and spondylitis caused by Brucella melitensis biovar 3
Source: Springer Nature journal article supplement (doi:10.1186/s12879-021-06142-3), 2021-05-20
Supplement: MOESM1 [file 19181358]

Table S1. Clinical and laboratory data of the patient with *Brucella* endocarditis and spondylitis.

| Characteristics                            | Date     |            |            |           |            |
|--------------------------------------------|----------|------------|------------|-----------|------------|
|                                            | 2018/7/1 | 2018/10/11 | 2018/10/27 | 2018/11/6 | 2019/10/22 |
| <b>Symptoms and signs</b>                  |          |            |            |           |            |
| Fever                                      | +        | +          | +          | +         | +          |
| Debility                                   | +        | +          | +          | +         | +          |
| Sweating                                   | +        | +          | +          | +         | +          |
| Arthralgia                                 | +        | +          | +          | +         | +          |
| Backache                                   | +        | +          | +          | +         | +          |
| Gingiva hemorrhage                         |          |            |            | +         | +          |
| Hemorrhagic spot on lower limbs            |          |            |            | +         | +          |
| Hepatomegaly                               |          |            |            |           | +          |
| Splenomegaly                               |          |            |            |           | +          |
| Edema                                      |          |            |            |           | +          |
| <b>Diagnostic results</b>                  |          |            |            |           |            |
| SAT (titer)                                | NA       | 1/800      | NA         | NA        | 1/800      |
| Cold abscess formed in psoas/spinae muscle | NA       | +          | NA         | ++        | -          |
| Vegetations (size)                         | NA       | 0.7*1.5cm  | NA         | 0.8*2.5cm | 1.3*1.5cm  |
| Enlarged left atrial/ventricle             | NA       | -          | NA         | +         | ++         |
| Heart failure                              | NA       | -          | NA         | -         | +          |
| <b>Laboratory testing</b>                  |          |            |            |           |            |
| WBC (10 <sup>9</sup> /L)                   | NA       | 4.3        | 4.8        | 4.7       | 7.1        |
| Haemoglobin (g/L)                          | NA       | 120↓       | 116↓       | 128↓      | 85↓        |

|                                   |    |        |        |       |         |
|-----------------------------------|----|--------|--------|-------|---------|
| Platelet (10 <sup>9</sup> /L)     | NA | 55↓    | 32↓    | 29↓   | 52↓     |
| RBC (10 <sup>12</sup> /L)         | NA | 3.99 ↓ | 3.97 ↓ | 4.32  | 3.03 ↓  |
| Albumin (g/L)                     | NA | 33.1 ↓ | 37.8↓  | 36.3↓ | 34.6 ↓  |
| Globulin (g/L)                    | NA | 41.1 ↑ | 44.5↑  | 43.0↑ | 32.6    |
| Creatinine phosphokinase (umol/L) | NA | 55.1   | 48.4   | 49.7  | 252.6 ↑ |
| ESR                               | NA | 32↑    | 56↑    | 19 ↑  | 35 ↑    |

---

“-”represents no indication; WBC: white blood cell; RBC: red blood cell; ESR: erythrocyte sedimentation rate.
